# Supplementary material for: Spatiotemporal control of neutrophil fate to tune inflammation and repair for myocardial infarction therapy
Source: PubMed Central journal article supplement — Nat Commun. 2024 Oct 1;15:8481. doi: 10.1038/s41467-024-52812-6 (PMC11445496; doi:10.1038/s41467-024-52812-6), 2024-10-01
Supplement: 41467_2024_52812_MOESM1_ESM.pdf [file 41467_2024_52812_MOESM1_ESM.pdf]

# Spatiotemporal control of neutrophil fate to tune inflammation and repair for myocardial infarction therapy

Cheesue Kim<sup>†</sup>, Hyeok Kim<sup>†</sup>, Woo-Sup Sim<sup>†</sup>, Mungyo Jung, Jihye Hong, Sangjun Moon, Jae-Hyun Park, Jin-Ju Kim, Mikyung Kang, Sungpil Kwon, Mi-Jeong Kim, Kiwon Ban, Hun-Jun Park\*, and Byung-Soo Kim\*

\*Correspondence to: [byungskim@snu.ac.kr](mailto:byungskim@snu.ac.kr) and [cardioman@catholic.ac.kr](mailto:cardioman@catholic.ac.kr)

<sup>†</sup>These authors contributed equally.

## **Contents:**

**Supplementary Fig. 1-16**

**Supplementary Table 1**

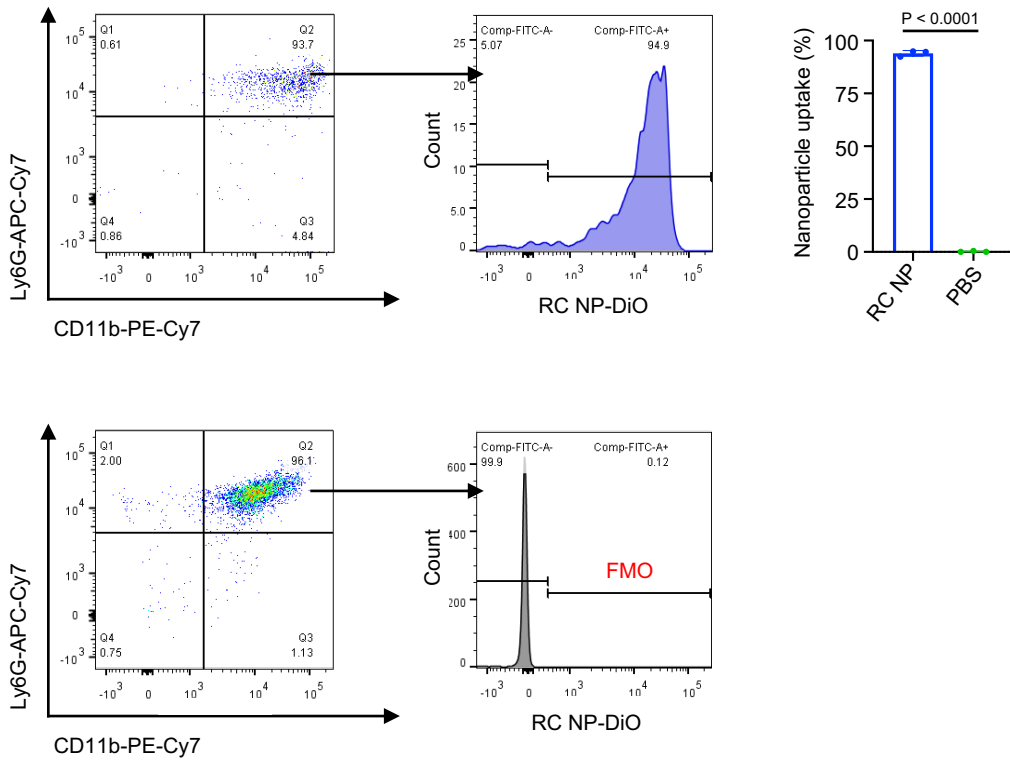

**Supplementary Fig. 1. Neutrophil uptake of RC NPs in vitro.** Neutrophil uptake of DiO-labelled RC NPs was determined by flow cytometry ( $n = 3$  biological replicates). RC NP<sup>+</sup> neutrophils were defined as Ly6G<sup>+</sup>CD11b<sup>+</sup>DiO<sup>+</sup> cells. Unpaired two-sided *t*-tests were used for comparisons. Data presented as mean  $\pm$  SD.

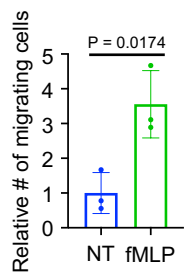

**Supplementary Fig. 2. fMLP induces neutrophil chemotaxis.** The relative number of neutrophils migrating through transwells was significantly increased upon fMLP (1 μM) treatment. (n = 3 biological replicates). Unpaired two-sided *t*-tests were used for comparison. Data presented as mean ± SD.

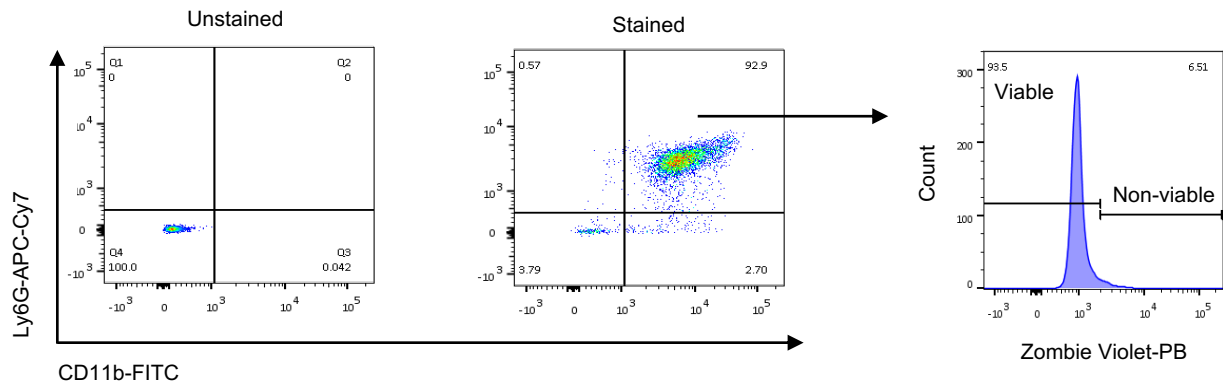

**Supplementary Fig. 3. Neutrophil viability in vitro.** Representative scatter plots after the in vitro treatments described in Fig. 2k. Neutrophils were isolated by density centrifugation with over 90% purity as determined by flow cytometry. Nonviable neutrophils were defined as Ly6G<sup>+</sup>CD11b<sup>+</sup>Zombie Violet<sup>+</sup> cells.

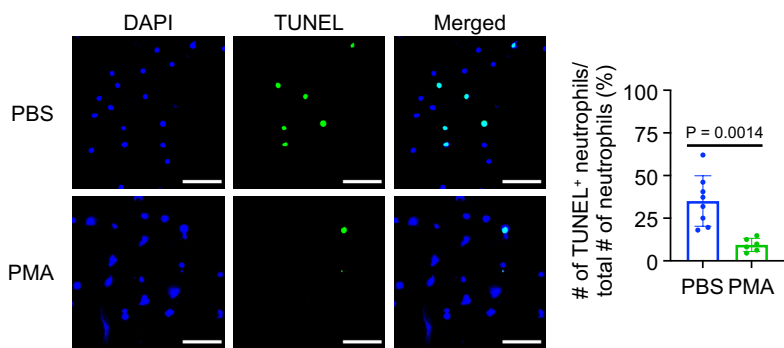

**Supplementary Fig. 4. PMA treatment significantly reduces neutrophil apoptosis.** Representative immunofluorescence images (left) and quantitative analysis (right) of TUNEL-stained neutrophils 15 hours after PBS or PMA (750 nM) treatment. (n = 6 for PMA, 8 for PBS). Scale bars, 50  $\mu$ m. Unpaired two-sided *t*-tests were used for comparison. Data presented as mean  $\pm$  SD.

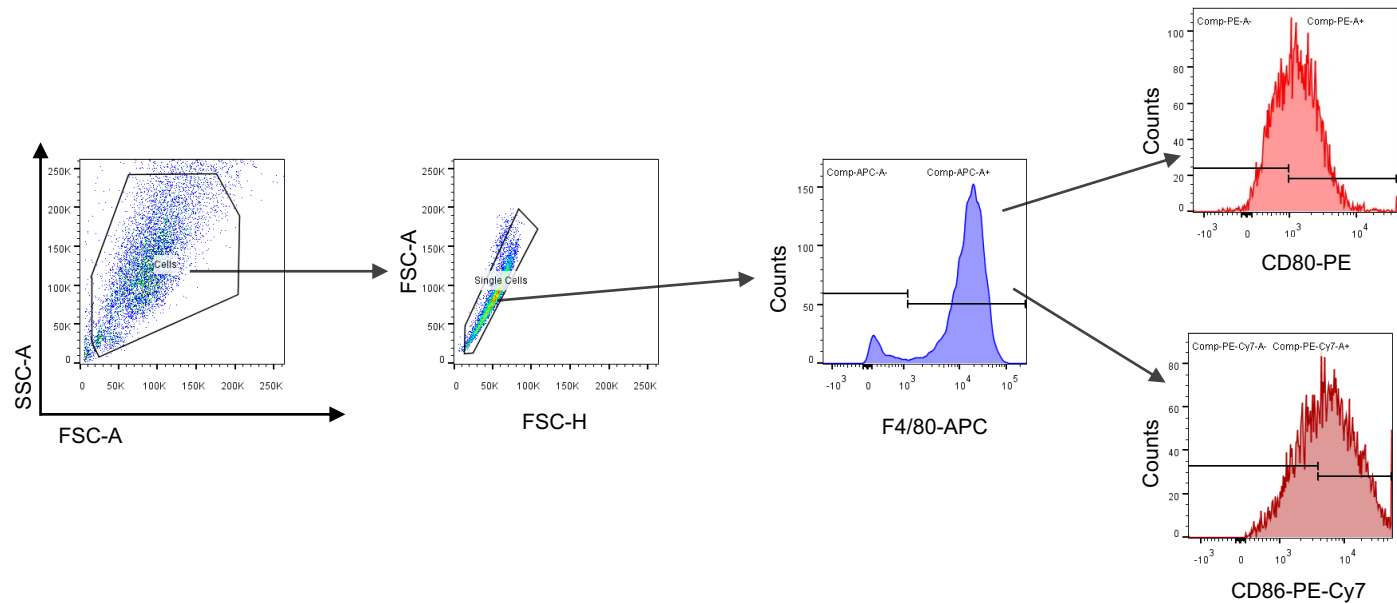

**Supplementary Fig. 5. Analysis of macrophage phenotypes after coculture.** Representative scatter plots for Fig. 4c, d. Macrophages were defined as F4/80<sup>+</sup> cells.

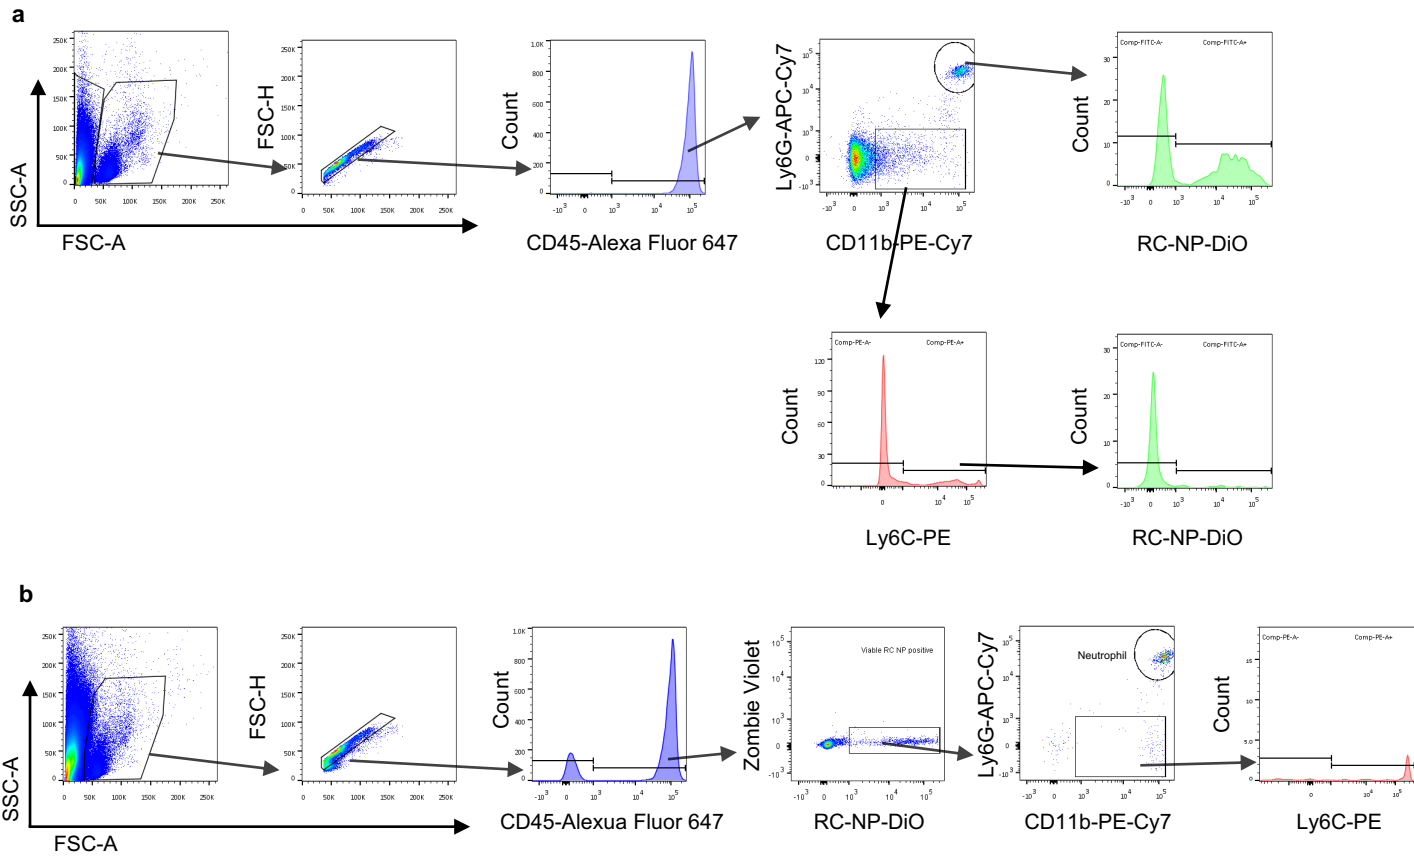

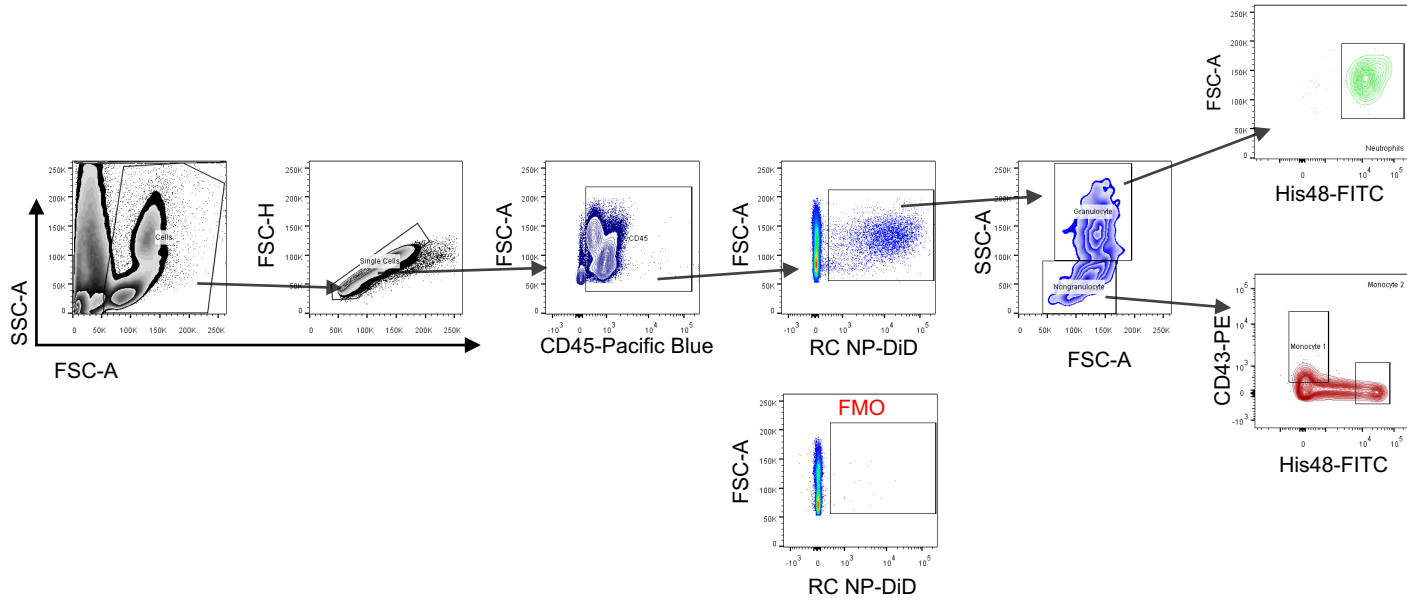

**Supplementary Fig. 7. Analysis of nanoparticle uptake by neutrophils in rat blood.** Representative scatter plots for Fig. 5b. Neutrophils were defined as  $CD45^+His48^+SSC^{high}$  cells while monocytes were defined as  $CD45^+CD43^{high}His48^{low}$  (nonclassical) and  $CD45^+CD43^{low}His48^{high}$  (classical) cells. RC NP uptake was determined by analyzing the percentage of cells positive for the DiD signal.



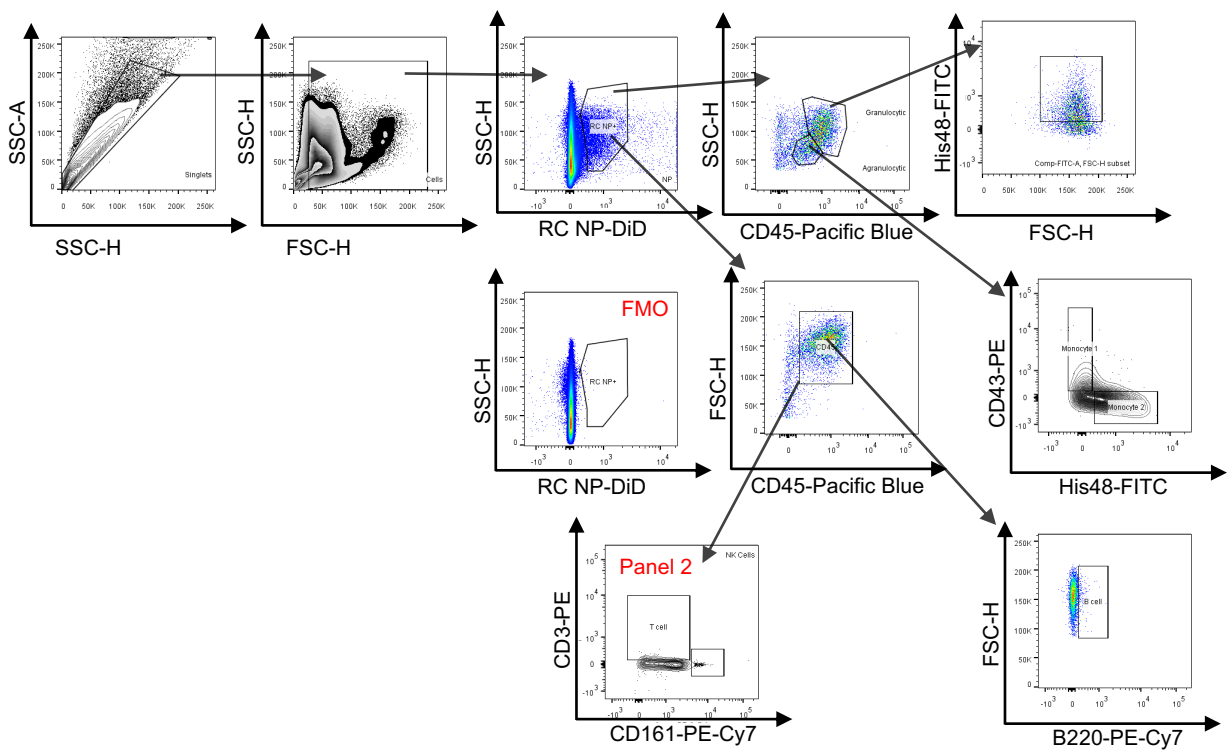

**Supplementary Fig. 8. Analysis of nanoparticle uptake in rat hearts.** Representative scatter plots for Fig. 5f. Neutrophils were defined as  $CD45^+His48^+SSC^{high}$  cells, monocytes as  $CD45^+CD43^{high}His48^{low}$  (nonclassical) and  $CD45^+CD43^{low}His48^{high}$  (classical) cells, B cells as  $CD45^+B220^+$  cells, T cells as  $CD45^+CD3^+$  cells, and NK cells as  $CD45^+CD161^+$  cells. RC NP uptake was determined by analyzing the percentage of cells positive for the DiD signal.

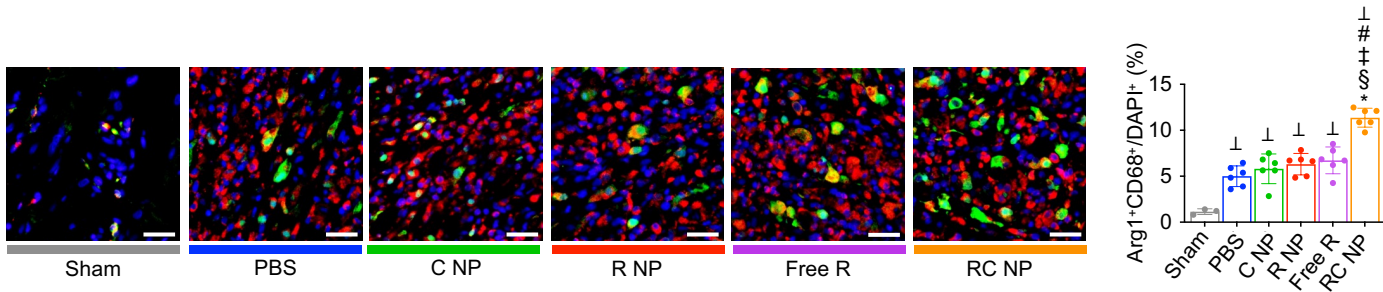

**Supplementary Fig. 9. Arg1 expression in cardiac macrophages.** Representative IHC images and quantitative analysis of Arg1<sup>+</sup> (green) macrophages (CD68<sup>+</sup>, red) in infarcted hearts 3 days post-MI (n = 3 for sham, 6 for other groups). Scale bars, 25 μm. \*p < 0.05 vs PBS; §p < 0.05 vs C NP; ‡p < 0.05 vs R NP; #p < 0.05 vs Free R; ⊥ p < 0.05 vs Sham. All data presented as mean ± SD. One-way ANOVA was used for all comparisons.

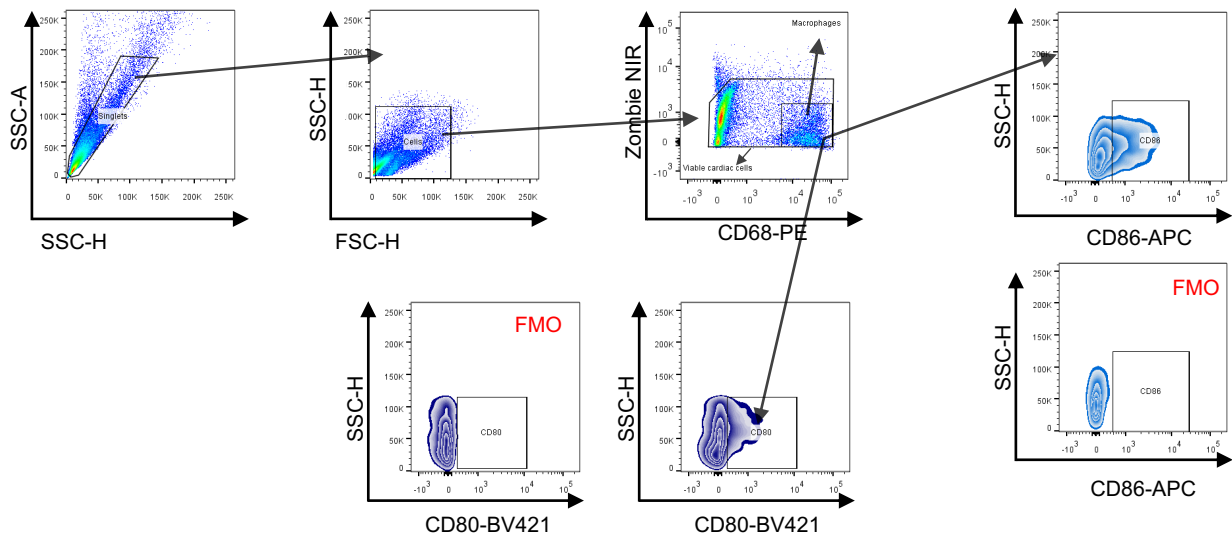

**Supplementary Fig. 10. Analysis of macrophage phenotypes in the hearts of MI rats.** Representative scatter plots for Fig. 6e. Macrophages were defined as CD68<sup>+</sup> cells.

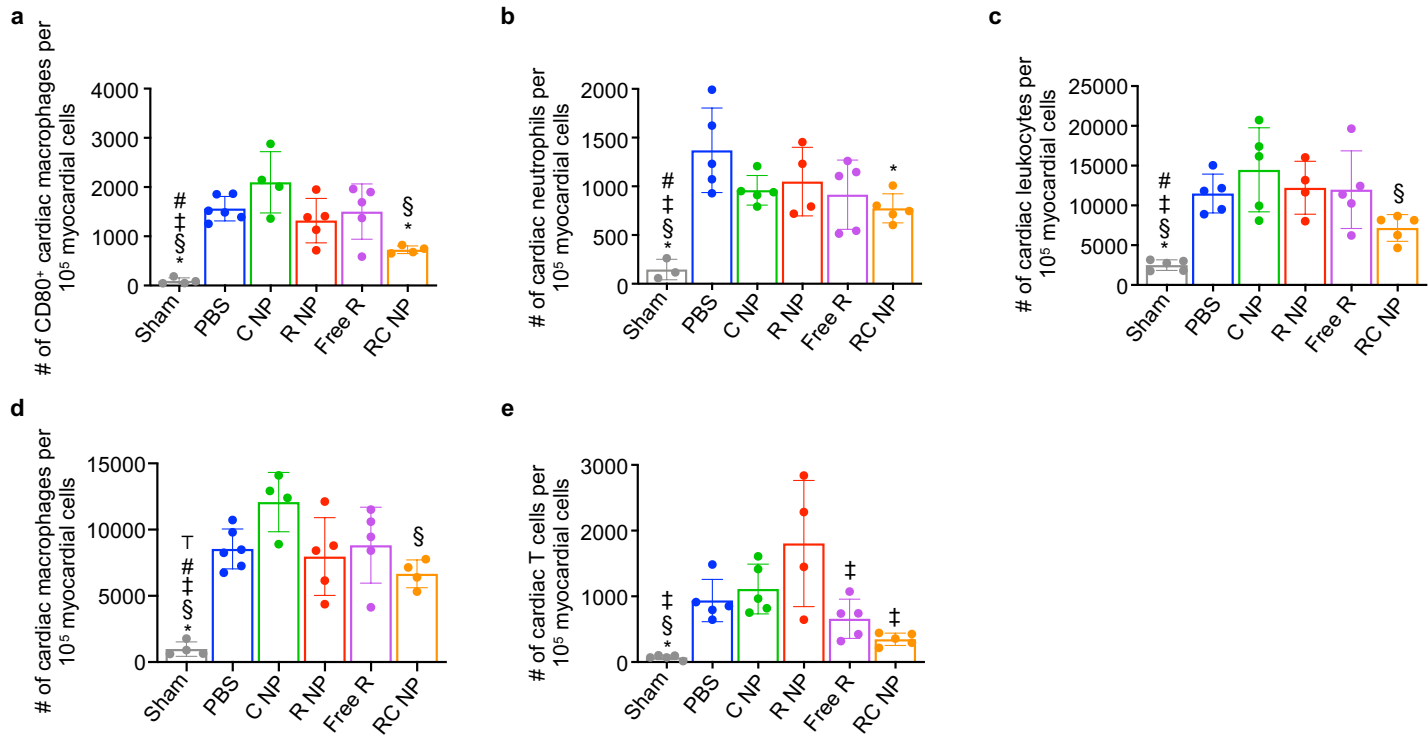

**Supplementary Fig. 11. Number of various leukocyte subsets per 10<sup>5</sup> myocardial cells in the hearts of MI rats.** Numbers of **a** M1 (C80<sup>+</sup>) cardiac macrophages and **b** cardiac neutrophils, **c** cardiac leukocytes, **d** cardiac macrophages, and **e** cardiac T cells per 10<sup>5</sup> myocardial cells 5 days after MI as determined by flow cytometry. For **a** and **d**, n = 4 for sham and RC NP, 5 for R NP and Free R, and 6 for PBS. For **b**, n = 3 for sham, 4 for R NP, and 5 for other groups. For **c** and **e**, n = 4 for R NP and 5 for other groups. \*p < 0.05 vs PBS; §p < 0.05 vs C NP; ‡p < 0.05 vs R NP; #p < 0.05 vs Free R; †p < 0.05 vs RC NP. All data presented as mean ± SD. One-way ANOVA was used for all comparisons.

**a**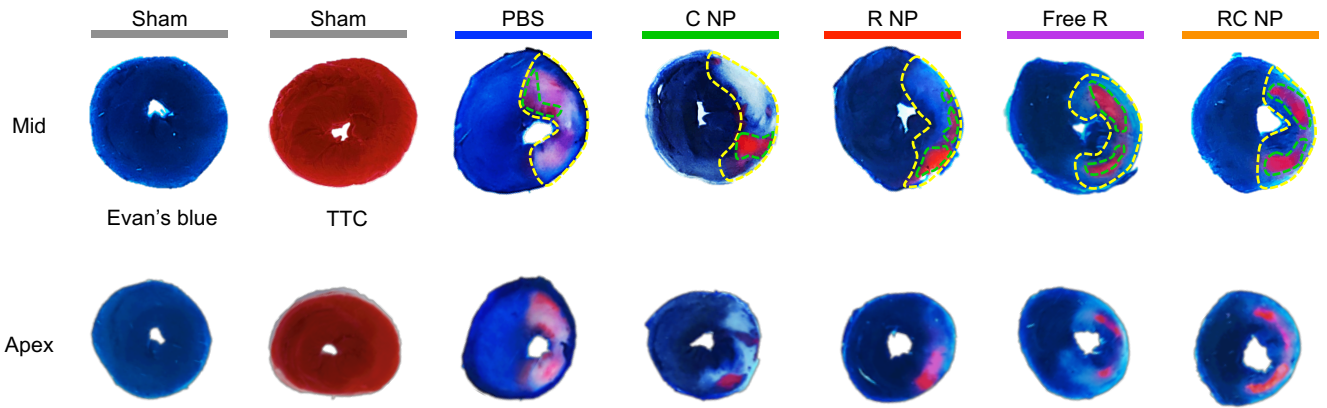**b**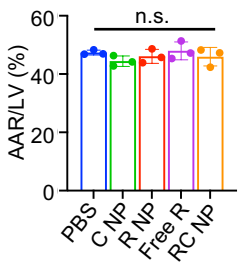**c**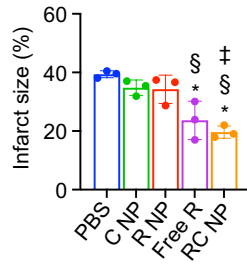

**Supplementary Fig. 12. Infarct sizes 24 hours after MI.** **a** Evan's blue and TTC staining of infarcted hearts 24 hours after MI. Yellow dotted lines indicate area at risk (AAR); green lines indicate viable myocardium area within the area at risk; white area (unstained area) indicates infarct size. Quantification of **(b)** AAR and **(c)** infarct sizes ( $n = 3$ ). \* $p < 0.05$  vs PBS; § $p < 0.05$  vs C NP; † $p < 0.05$  vs R NP; n.s., not significant. One-way ANOVA was used for all comparisons. All data presented as mean  $\pm$  SD.

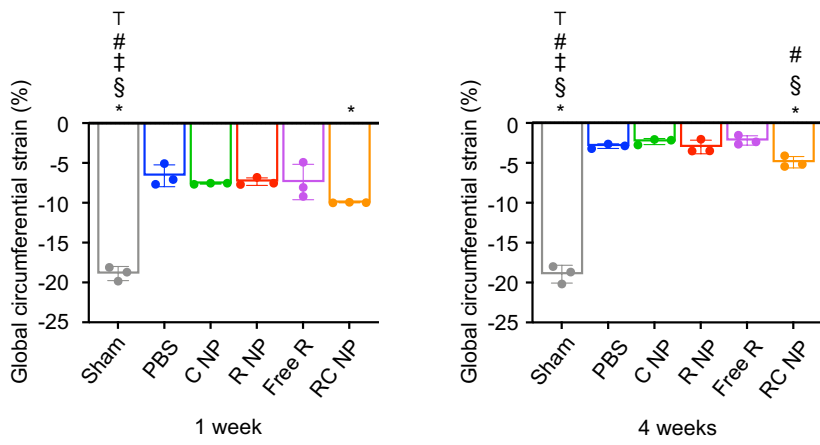

**Supplementary Fig. 13. Cardiac strain analysis 4 weeks after MI.** Global circumferential strain measurements 1 and 4 weeks after MI (n = 3). \*p < 0.05 vs PBS; §p < 0.05 vs C NP; ‡p < 0.05 vs R NP; #p < 0.05 vs Free R; Tp < 0.05 vs RC NP. All data presented as mean ± SD. One-way ANOVA was used for comparisons.

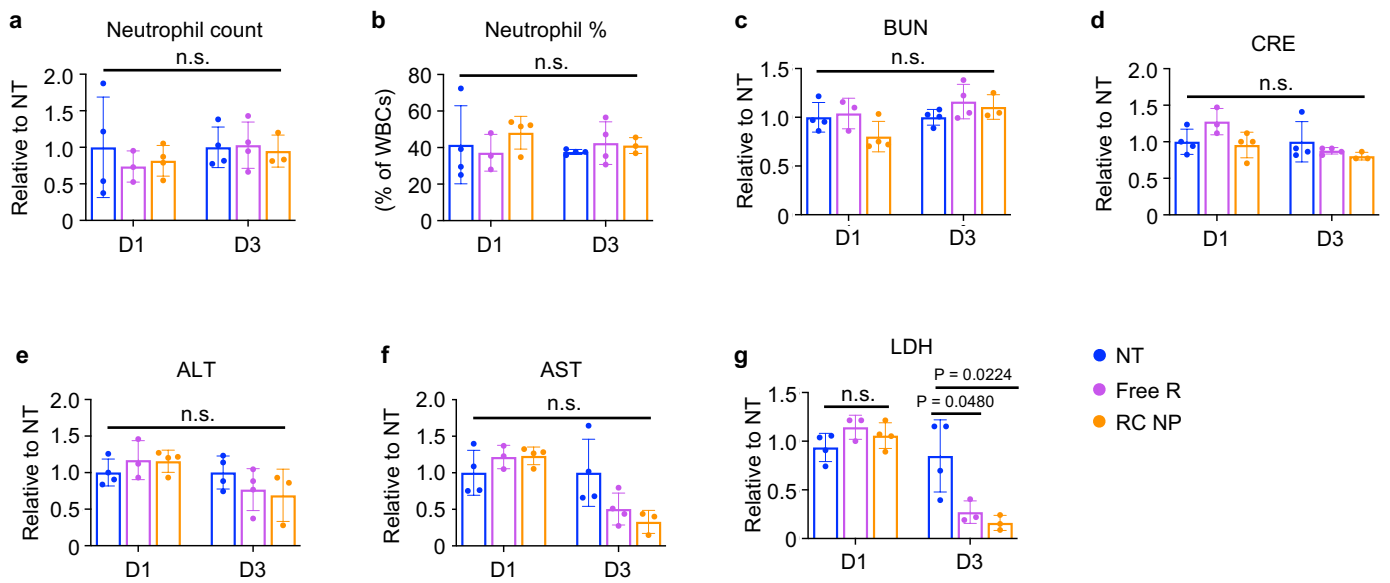

**Supplementary Fig. 14. RC NP biocompatibility in MI rats.** Blood profiles of MI rats receiving no injection, Free R injection, or RC NP injection 1 and 3 days after injection. (n = 3 for D1 Free R, D3 RC NP, and D3 Free R LDH, 4 for other groups); n.s., not significant). **a** Relative neutrophil counts, **b** neutrophil percentage, **c** relative BUN blood urea nitrogen levels, **d** relative CRE creatinine levels, **e** Relative ALT alanine aminotransferase levels, **f** relative AST aspartate aminotransferase levels, and **g** relative LDH lactate dehydrogenase levels. All data presented as mean ± SD. One-way ANOVA was used for comparisons.

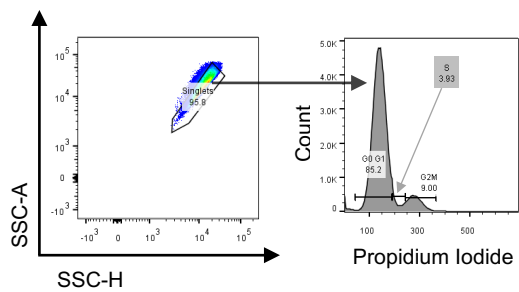

**Supplementary Fig. 15. Analysis of cell-cycle arrest in rats.** Representative scatter plots for Fig 10c.



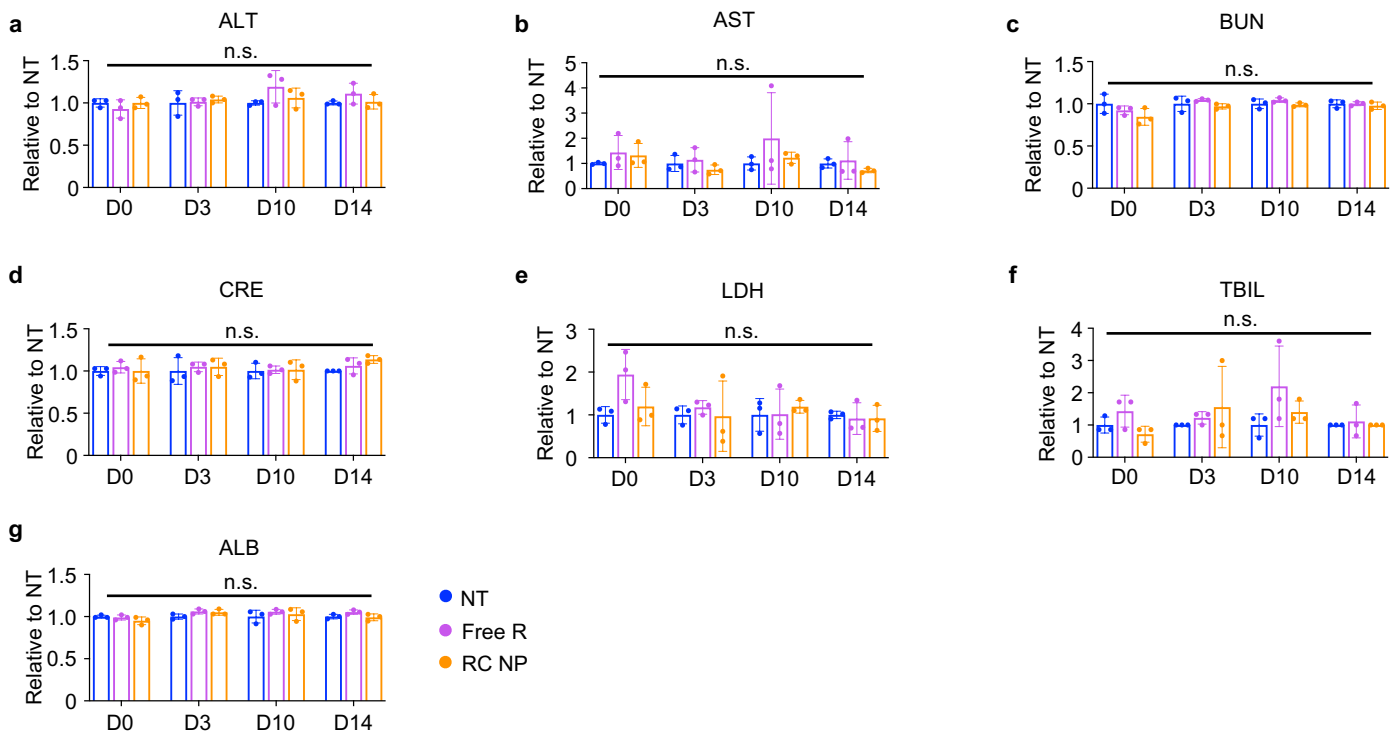

**Supplementary Fig. 16. RC NP biocompatibility in uninjured rats.** Blood serum chemistry of uninjured rats receiving no injection, Free R injection, or RC NP injection 3, 10, and 14 days after injection. Day 0 indicates blood serum profiles immediately before intravenous injection **a** Relative ALT alanine aminotransferase levels, **b** relative AST aspartate aminotransferase levels, **c** relative BUN blood urea nitrogen levels, **d** relative CRE creatinine levels, **e** relative LDH lactate dehydrogenase levels, **f** relative TBIL total bilirubin levels, and **g** relative ALB albumin levels. (n =3; n.s, not significant). All data presented as mean ± SD. Two-way ANOVA was used for comparisons.

| Gene                 | Forward                           | Backward                           |
|----------------------|-----------------------------------|------------------------------------|
| <i>Gapdh</i> (mouse) | ATGTGTCCGTCGTGGATCTGA             | TGCCTGCTTCACCTTCT                  |
| <i>Nos2</i> (mouse)  | CTTTGCCACGGACGAGAC                | TCATTGTACTCTGAGGGCTGAC             |
| <i>Mertk</i> (mouse) | GTGGCAGTGAAGACCATGAAGTTG          | GAACTCCGGGATAGGGAGTCAT             |
| <i>Gapdh</i> (rat)   | CCTGGCCAAGGTCATCCATGACAAC<br>TTGG | GCCATGAGGTCCACCACCCTGTTGCTGT<br>AG |
| <i>Bax</i> (rat)     | CTGCAGAGGATGATTGCTGA              | GATCAGCTCGGGCACTTTAG               |
| <i>Bcl2</i> (rat)    | GCTACGAGTGGGATACTG                | GTGTGCAGATGCCGGTTC                 |
| <i>Bclxl</i> (rat)   | ATGTCTCAGAGAACCGGC                | TCACTTCCGACTGAAGAGTG               |

**Supplementary Table 1.** Primers used for qRT-PCR analyses
